# Supplementary material for: The ultra-high thermoelectric power factor in facile and scalable single-step thermal evaporation fabricated composite SnSe/Bi thin films
Source: Royal Society of Chemistry journal article supplement (doi:10.1039/d2tc03719j), 2022-01-01
Supplement: d2tc03719j1.pdf [file d2tc03719j1.pdf]

# The ultra-high thermoelectric power factor in facile and scalable single-step thermal evaporation fabricated composite SnSe/Bi thin film

Manoj Kumar<sup>1,2,3</sup>, Sanju Rani<sup>1,2</sup>, Rahul Parmar<sup>4</sup>, M. Amati<sup>4</sup>, L. Gregoratti<sup>4</sup>, Abhishek Ghosh<sup>5</sup>, Saurabh Pathak<sup>6</sup>, Anil Kumar<sup>7</sup>, Xu Wang<sup>3\*</sup>, Vidya Nand Singh<sup>1,2\*</sup>

<sup>1</sup>Academy of Scientific and Innovative Research (AcSIR), Ghaziabad, Uttar Pradesh- 201002, India

<sup>2</sup>Indian Reference Materials (BND) Division, CSIR-National Physical Laboratory, Dr. K. S. Krishnan Marg, New Delhi-110012, India

<sup>3</sup>School of Engineering, RMIT University, VIC 3000 Australia

<sup>4</sup>Elettra-Sincrotrone, Strada Statale 14, AREA Science Park 34149, Basovizza, Trieste, Italy

<sup>5</sup>Thin Film Laboratory, Department of Physics, Indian Institute of Technology Delhi, New Delhi 110016, India

<sup>6</sup>National Creative Research Initiative Center for Spin Dynamics and SW Devices, Nanospinics Laboratory, Research Institute of Advanced Materials, Department of Materials Science and Engineering, Seoul National University, Seoul 151-744, South Korea

<sup>7</sup>Department of Physics, M.N.S. Govt. College, Bhiwani, Haryana -127021, India

Corresponding authors: [xu.wang@rmit.edu.au](mailto:xu.wang@rmit.edu.au) (X Wang), [singhvn@nplindia.org](mailto:singhvn@nplindia.org) (VNS),

**Supplementary Information**

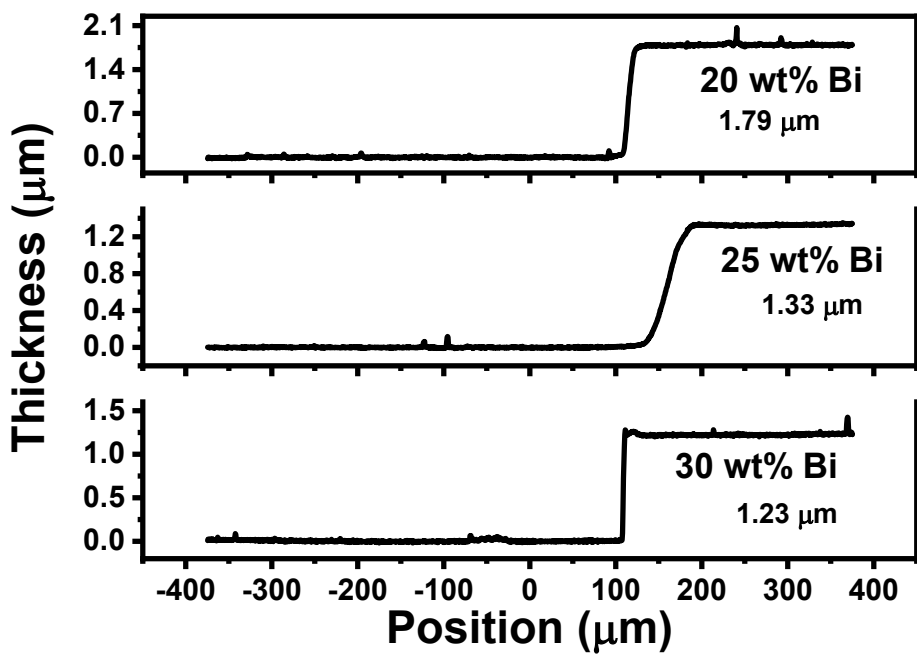

Figure S1. Thickness measurement of the SnSe/Bi composite samples

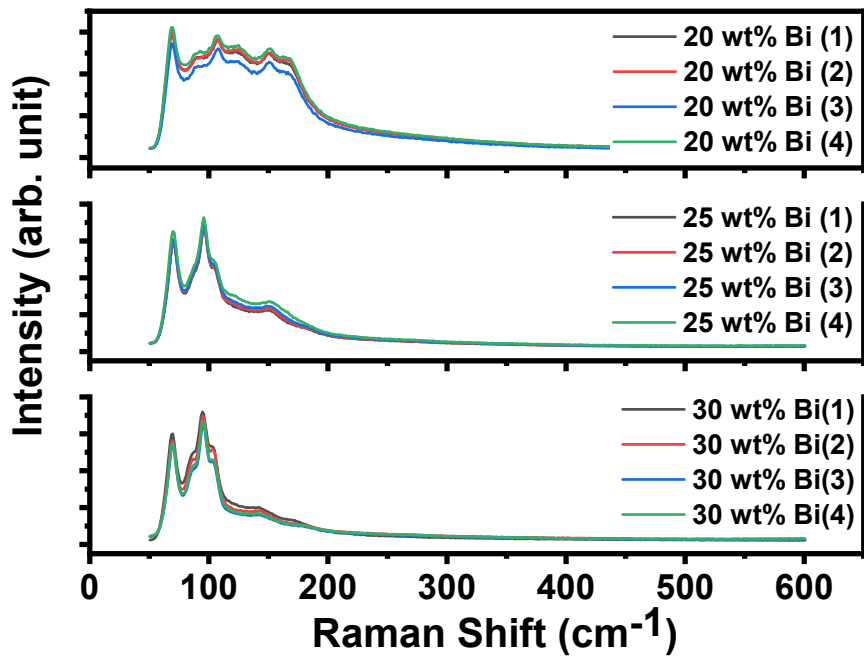

Figure S2- Raman spectra of the samples taken at 4 random points.

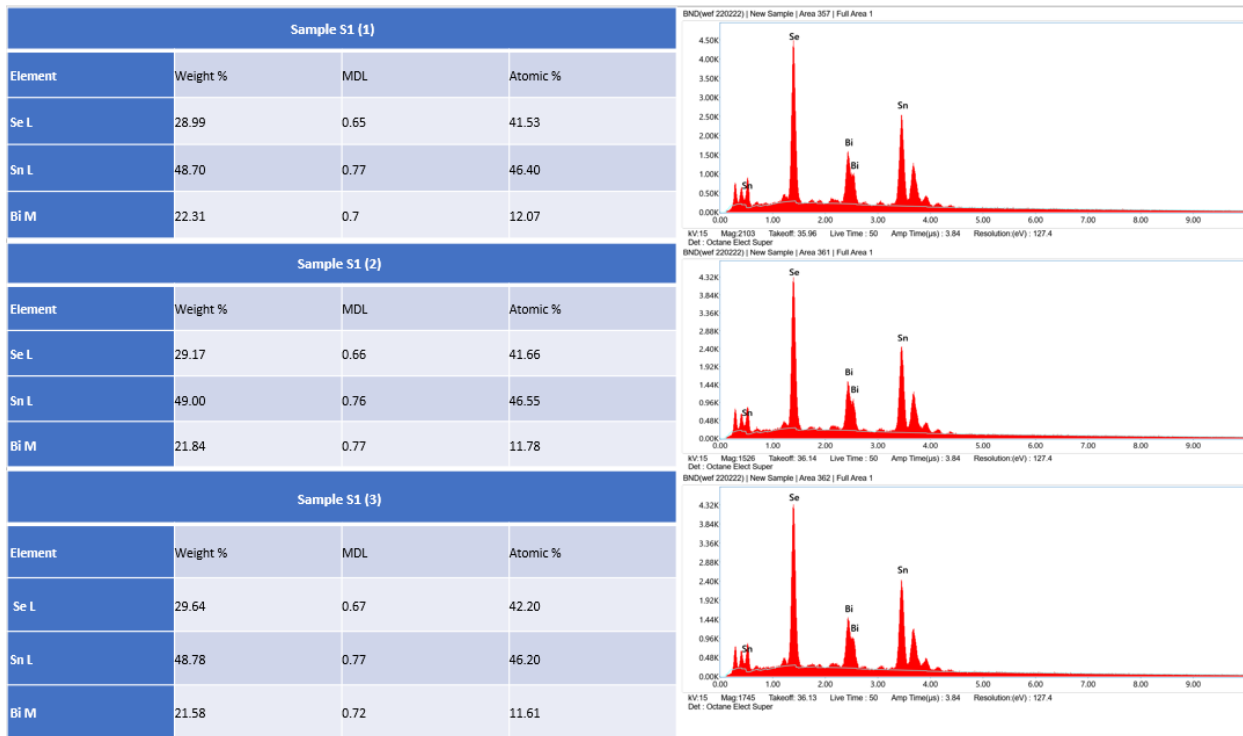

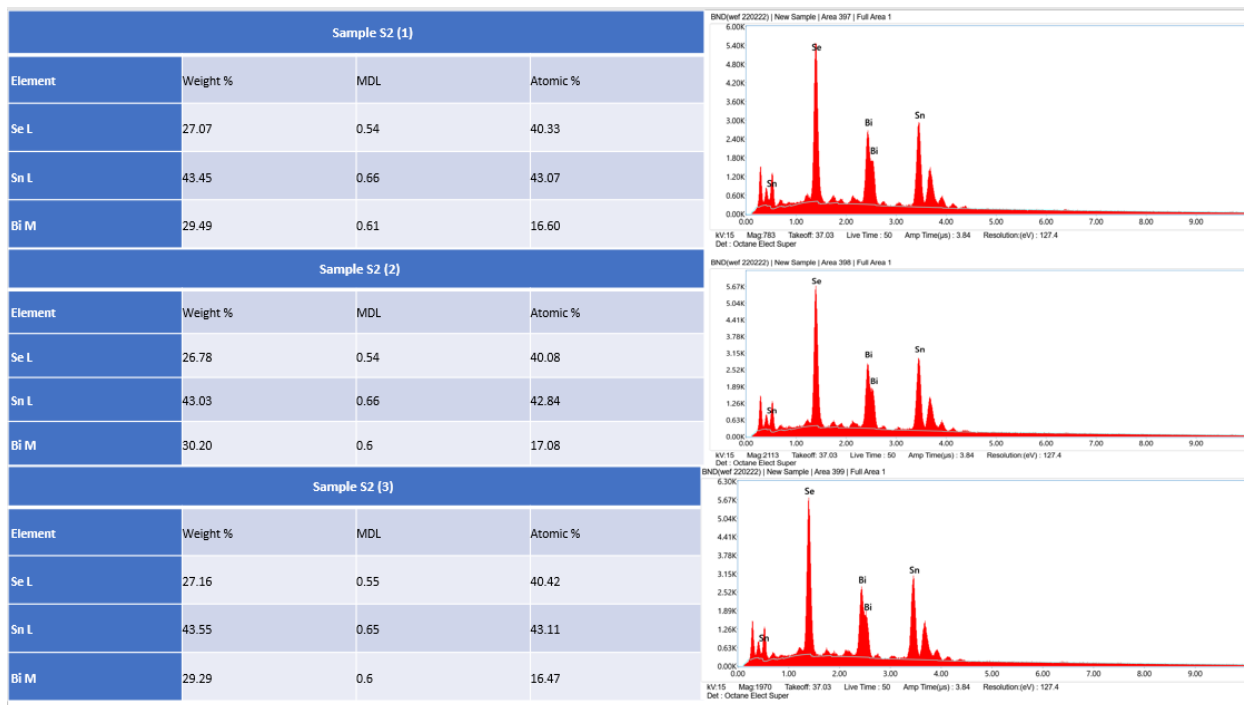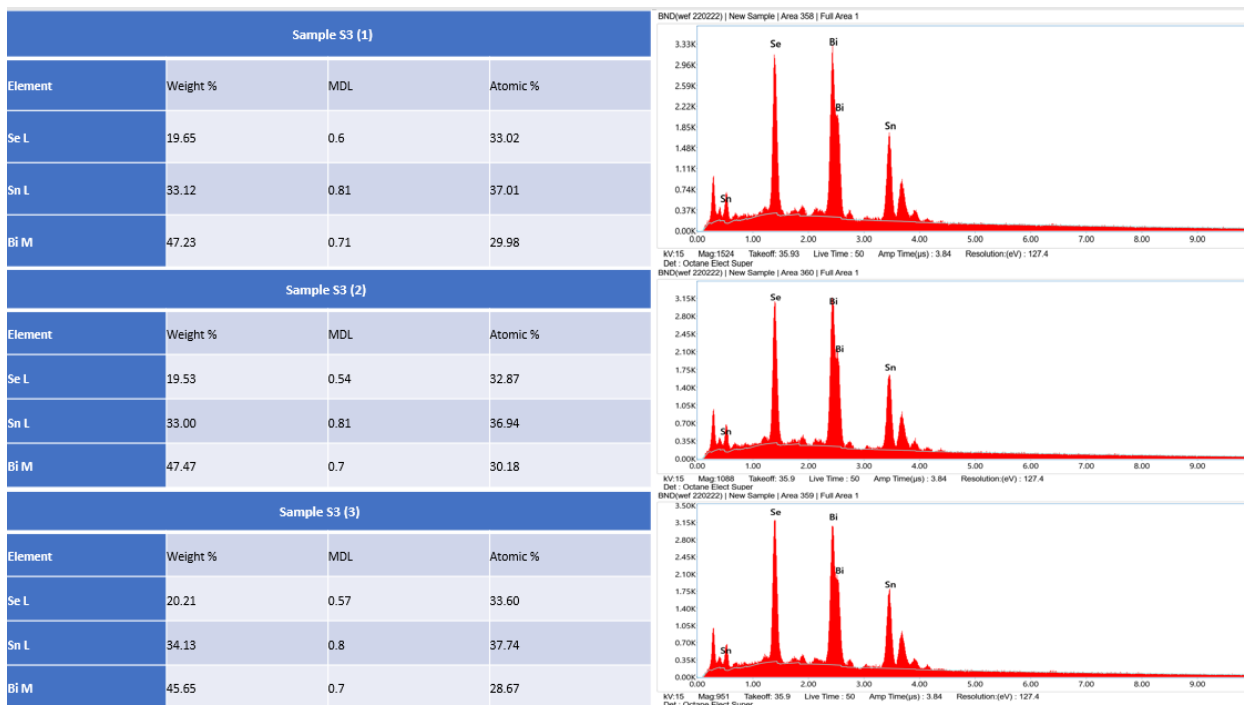

**Figure S3 Top to bottom, EDX spectrum of the samples 20 wt% Bi, 25 wt% Bi and 30 wt% Bi, respectively at 3 different places on sample, respectively.**

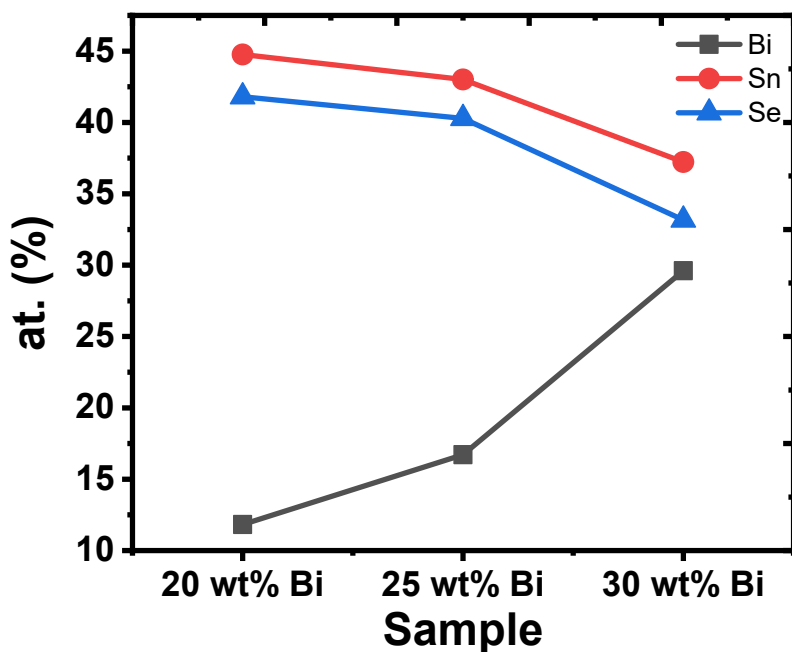

**Figure S4- EDX spectra of the samples showing concentration of Sn, Se decreases and of Bi increases with increasing wt% of Bi.**

**Table S1 – Comparison of the SnSe thermoelectric materials**

| Sr. No. | Material/subst -rate               | Growth method        | Temperature (K) | Power factor ( $\mu\text{Wcm}^{-1}\text{K}^{-2}$ ) | ZT     | Reference |
|---------|------------------------------------|----------------------|-----------------|----------------------------------------------------|--------|-----------|
| 1       | SnSe/fused silica                  | Sputtering           | 675             | 2.4                                                |        | [1]       |
| 2       | SnSe/sapphire                      | PLD                  | 800             | 1.96                                               | 0.45   | [2]       |
| 3       | SnSe/semi-insulating silicon (111) | MPCVD                | 600             | 3.98                                               | 0.335  | [3]       |
| 4       | Mo-doped SnSe/Schott-D263T glass   | Magnetron sputtering | 576             | 0.44                                               |        |           |
| 5       | Bi-doped SnSe/STO(100)             | PLD                  | 573             | 0.3                                                | 0.034* | [4]       |

|     |                                                  |                                  |     |                        |       |           |
|-----|--------------------------------------------------|----------------------------------|-----|------------------------|-------|-----------|
| 6   | Bi-doped SnSe/intrinsic Si (100)                 | CVD                              | 700 | 0.6                    | 0.08* | [5]       |
| 7   | SnSe/Si substrate having 300 nm SiO <sub>2</sub> | PLD                              | 478 | 18.5                   |       | [6]       |
| 8   | SnSe ink/glass                                   | Solution process                 | 550 | 4.27                   |       | [7]       |
| 9   | SnSe/SiO <sub>2</sub> /Si                        | PLD                              | 573 | 0.15                   |       | [8]       |
| 10  | SnSe/MgO                                         | PLD                              | 600 | 4.72                   | 1.2*  | [9]       |
| 11. | SnSe single crystal                              | vertical Bridgman crystal growth | 923 | ~10 @ 850 K            | 2.62  | [10]      |
| 12. | SnSe polycrystal                                 | Solid state reaction             | 783 | 12.06 @ 473 K prep. To | 3.1   | [11]      |
| 13  | Bi mixed SnSe/SiO <sub>2</sub> (300 nm thick)    | Thermal evaporation method       | 580 | ~ 8                    |       | This work |

Microwave plasma chemical vapor deposition (MPCVD)

Pulsed laser deposition PLD

SrTiO<sub>3</sub> (STO)

Chemical vapor deposition CVD

\*here ZT is calculated conservatively using literature data on thermal conductivity

#### References-

- [1] L. Song, J. Zhang, and B. B. Iversen, "Enhanced thermoelectric properties of SnSe thin films grown by single-target magnetron sputtering," *J. Mater. Chem. A*, vol. 7, no. 30, pp. 17981–17986, 2019, doi: 10.1039/c9ta03252e.
- [2] S. Saini, P. Mele, and A. Tiwari, "Influence of the planar orientation of the substrate on thermoelectric response of SnSe thin films," *J. Phys. Chem. Solids*, vol. 129, pp. 347–353, 2019, doi: 10.1016/j.jpcs.2019.01.010.
- [3] Y. Feng, X. Zhang, L. Lei, Y. Nie, and G. Xiang, "Rapid synthesis of thermoelectric SnSe

- thin films by MPCVD,” *RSC Adv.*, vol. 10, no. 20, pp. 11990–11993, 2020, doi: 10.1039/d0ra01203c.
- [4] T. Horide, K. Nakamura, Y. Hirayama, K. Morishita, M. Ishimaru, and K. Matsumoto, “Thermoelectric Property of n-Type Bismuth-Doped SnSe Film Defect,” *ACS Appl. Energy Mater.*, vol. 4, pp. 9563–9571, 2021.
- [5] J. Pang, X. Zhang, L. Shen, J. Xu, Y. Nie, and G. Xiang, “Synthesis and thermoelectric properties of Bi-doped SnSe thin films\*,” *Chinese Phys. B*, vol. 30, no. 11, p. 116302, 2021, doi: 10.1088/1674-1056/ac11da.
- [6] C. H. Suen *et al.*, “Enhanced thermoelectric properties of SnSe thin films grown by pulsed laser glancing-angle deposition,” *J. Mater.*, vol. 3, no. 4, pp. 293–298, 2017, doi: 10.1016/j.jmat.2017.05.001.
- [7] S. H. Heo *et al.*, “Composition change-driven texturing and doping in solution-processed SnSe thermoelectric thin films,” *Nat. Commun.*, vol. 10, no. 1, 2019, doi: 10.1038/s41467-019-08883-x.
- [8] X. Gong *et al.*, “Highly (1 0 0)-orientated SnSe thin films deposited by pulsed-laser deposition,” *Appl. Surf. Sci.*, vol. 535, no. February 2020, p. 147694, 2021, doi: 10.1016/j.apsusc.2020.147694.
- [9] S. Hou, Z. Li, Y. Xue, X. Ning, J. Wang, and S. Wang, “Surprisingly high in-plane thermoelectric performance in a-axis-oriented epitaxial SnSe thin films,” *Mater. Today Phys.*, vol. 18, p. 100399, 2021, doi: 10.1016/j.mtphys.2021.100399.
- [10] L. D. Zhao *et al.*, “Ultralow thermal conductivity and high thermoelectric figure of merit in SnSe crystals,” *Nature*, vol. 508, no. 7496, pp. 373–377, 2014, doi: 10.1038/nature13184.
- [11] C. Zhou *et al.*, “Polycrystalline SnSe with a thermoelectric figure of merit greater than the single crystal,” *Nat. Mater.*, 2021, doi: 10.1038/s41563-021-01064-6.
